# Supplementary material
Source: ML conference proceedings conference paper supplement (https://openaccess.thecvf.com/content/CVPR2023/html/Ling_ShadowNeuS_Neural_SDF_CVPR_2023_paper.html)
Supplement: Supplementary file 1 [file Ling_ShadowNeuS_Neural_SDF_CVPR_2023_supplemental.zip]

Archive with 2 entries (2 files):
- 2293_supp.pdf
- 2293_supp_video_720p.mp4
